# Supplementary material for: Chemical Transport Knockout for Oxidized Vitamin C, Dehydroascorbic Acid, Reveals Its Functions in vivo
Source: PubMed Central journal article supplement (PMC5605377; doi:10.1016/j.ebiom.2017.08.017), 2017-08-22
Supplement: mmc2.pdf [file mmc2.pdf]

# Supplemental Figure 1

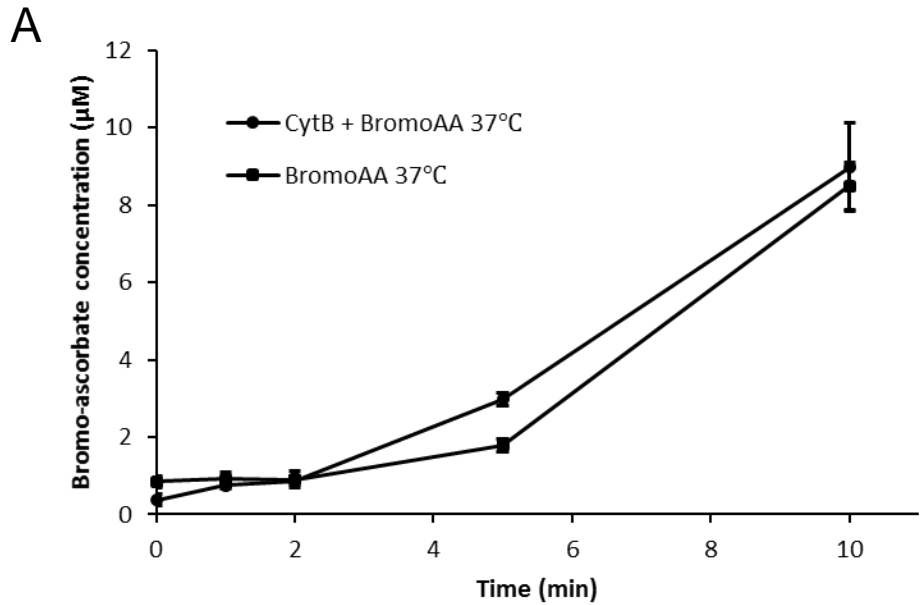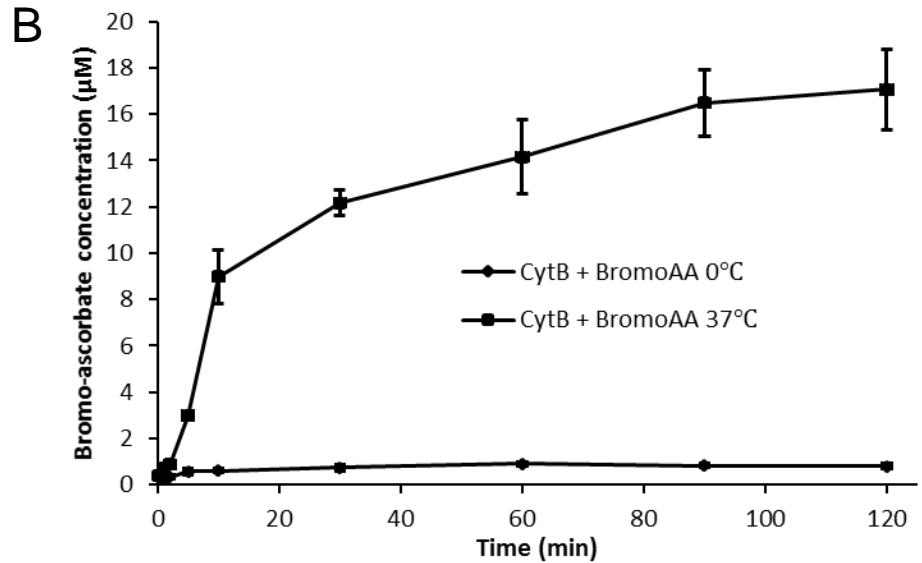

Supplemental Figure 2

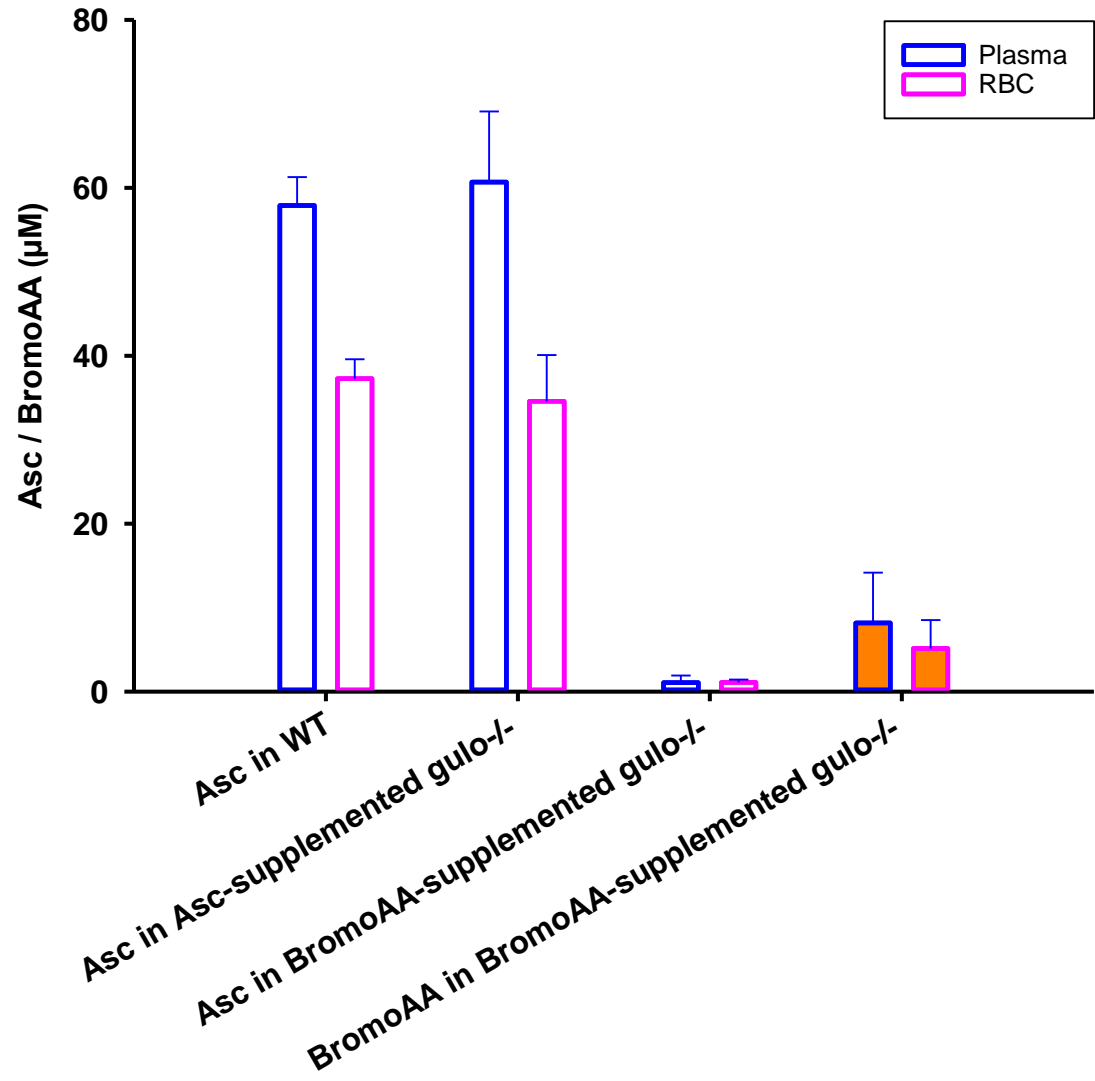

# Supplemental Figure 3

Ascorbate  
Supplemented

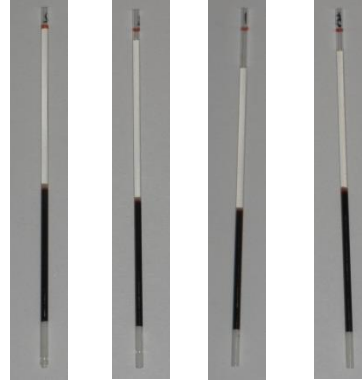

Ascorbate  
 $62.5 \pm 9.8 \mu\text{M}$

Unsupplemented

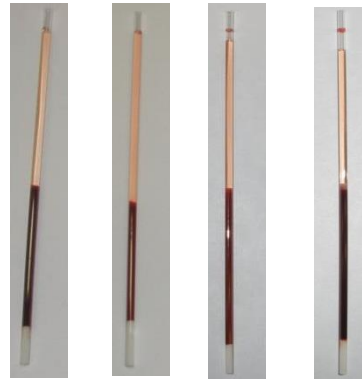

Ascorbate  
 $4.4 \pm 2.7 \mu\text{M}$

**Supplemental Table 1 Histopathologic findings of *gulo*<sup>-/-</sup> mice supplemented with bromoAA (N = 7, 60-64 weeks old) or ascorbate (N = 3, 60-64 weeks old) for one year**

| BrAA <i>gulo</i> <sup>-/-</sup> mice |                                                                                                                                                                                           | AA <i>gulo</i> <sup>-/-</sup> mice |                                                                                                                                                                                                                |
|--------------------------------------|-------------------------------------------------------------------------------------------------------------------------------------------------------------------------------------------|------------------------------------|----------------------------------------------------------------------------------------------------------------------------------------------------------------------------------------------------------------|
| A                                    | Ear (middle and inner) – Spiral ganglion atrophy, Spiral ligament degeneration; Kidney, Salivary glands – lymphoid aggregates                                                             | 63                                 | Salivary glands – exorbital dacryoadenitis; Liver – Hepatitis; Harderian gland – lymphoid aggregates                                                                                                           |
| B                                    | Ear (middle and inner) – Spiral ganglion atrophy, Spiral ligament degeneration; Kidney, Salivary glands, Liver, Lung – lymphoid aggregates; Harderian gland – adenomas; Liver – Hepatitis | 64                                 | Ear (middle and inner) – polyps, mineralization and osseous metaplasia; Salivary glands – exorbital dacryoadenitis, lymphoid hyperplasia; Kidney – lymphoid aggregates, tubular proteinosis; Liver – Hepatitis |
| C                                    | Ear (middle and inner) – Spiral ganglion degeneration; Kidney, Salivary glands, Lung – lymphoid aggregates; Liver – Hepatitis; Harderian gland – adenomas                                 | 65                                 | Salivary glands – exorbital dacryoadenitis, Kidney – lymphoid aggregates, tubular proteinosis; Liver – Hepatitis                                                                                               |
| D                                    | Ear (middle and inner) – Spiral ganglion degeneration; Kidney, Salivary glands, Liver – lymphoid aggregates; Liver – Hepatitis; Harderian gland – adenomas                                |                                    |                                                                                                                                                                                                                |
| E                                    | Ear (middle and inner) – Spiral ganglion degeneration; Kidney, Salivary glands, Harderian gland – lymphoid aggregates; Liver – Hepatitis                                                  |                                    |                                                                                                                                                                                                                |
| F                                    | Ear (middle and inner) – Spiral ganglion, Spiral ligament degeneration; Kidney, Salivary glands, Liver, Pancreas – lymphoid aggregates; Harderian gland – adenomas                        |                                    |                                                                                                                                                                                                                |
| G                                    | Ear (middle and inner) – Spiral ganglion, Spiral ligament degeneration; Kidney, Salivary glands – lymphoid aggregates; Liver – Hepatitis; Harderian gland – adenomas                      |                                    |                                                                                                                                                                                                                |
